# Supplementary material
Source: Springer Nature journal article supplement (https://www.springermedizin.de/resource/supplementary/12889_2009_2320_MOESM2_ESM.pdf/9485374)

**Percentage (%)**

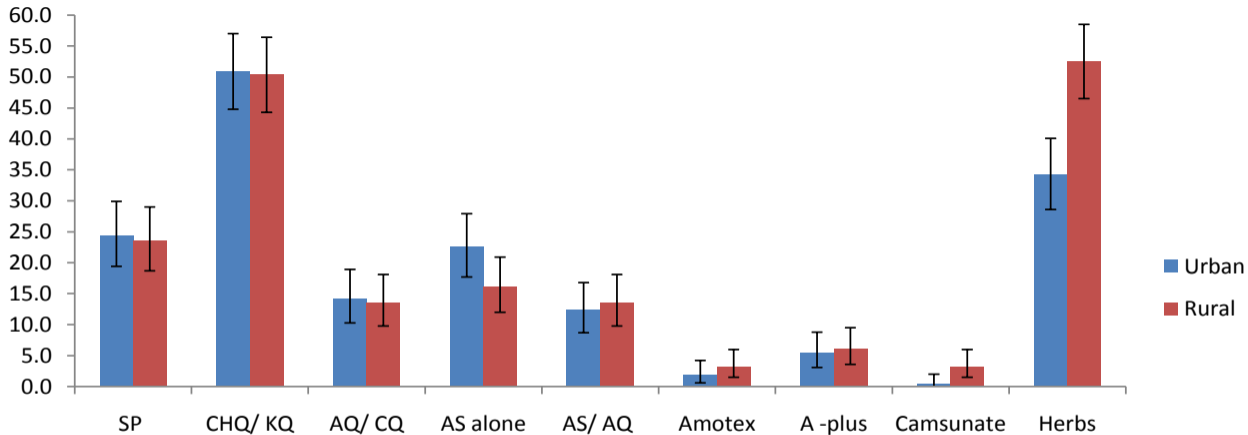

**Brand of antimalarial**

Supplement: MOESM2 [file 9485374]
